# Supplementary figures and images for: The visible transmittance and solar modulation ability of VO2 flexible foils simultaneously improved by Ti doping: an optimization and first principle study
Source: Royal Society of Chemistry journal article supplement (doi:10.1039/c3cp52009a), 2013-01-01

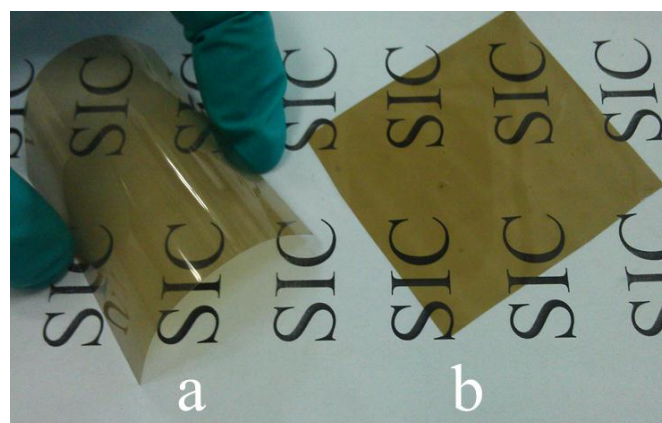

Supporting Figure S1 (a and b) Photographs of VO<sub>2</sub> foils at room temperature

Supplement: c3cp52009a.pdf [file c3cp52009a.pdf]
